# Supplementary material for: Dynamic Model for RNA-seq Data Analysis
Source: Hindawi journal article supplement (doi:10.1155/2015/916352), 2015-01-01
Supplement: f1 [file 916352.f1.pdf]

### Mean Curves for Gene ABHD10

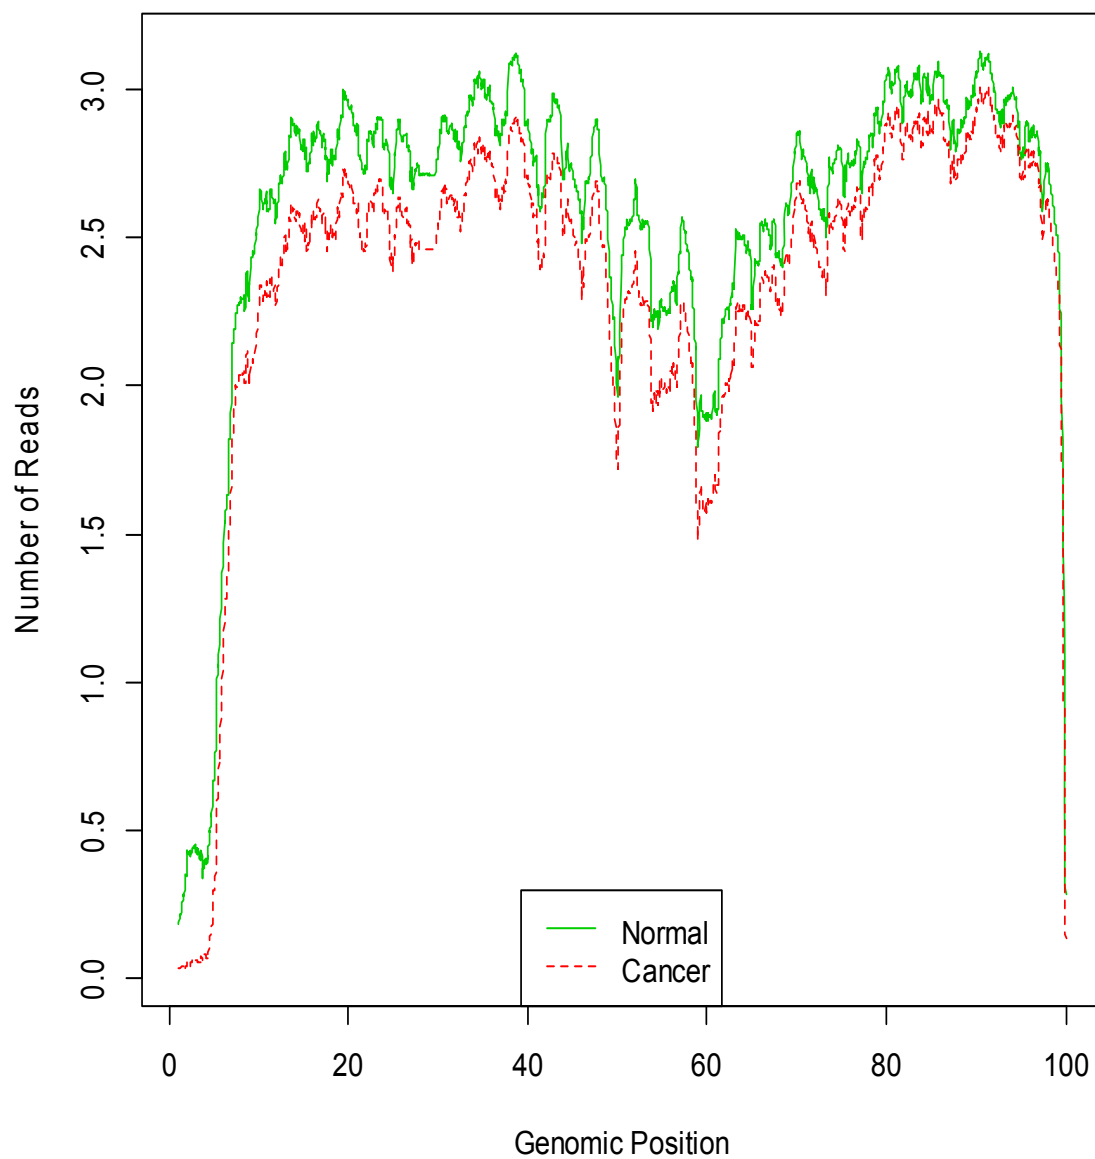

Fig S1A. Average expression curves of gene ABHD10 in the tumor and normal samples.

### Mean Response Curves for Gene ABHD10

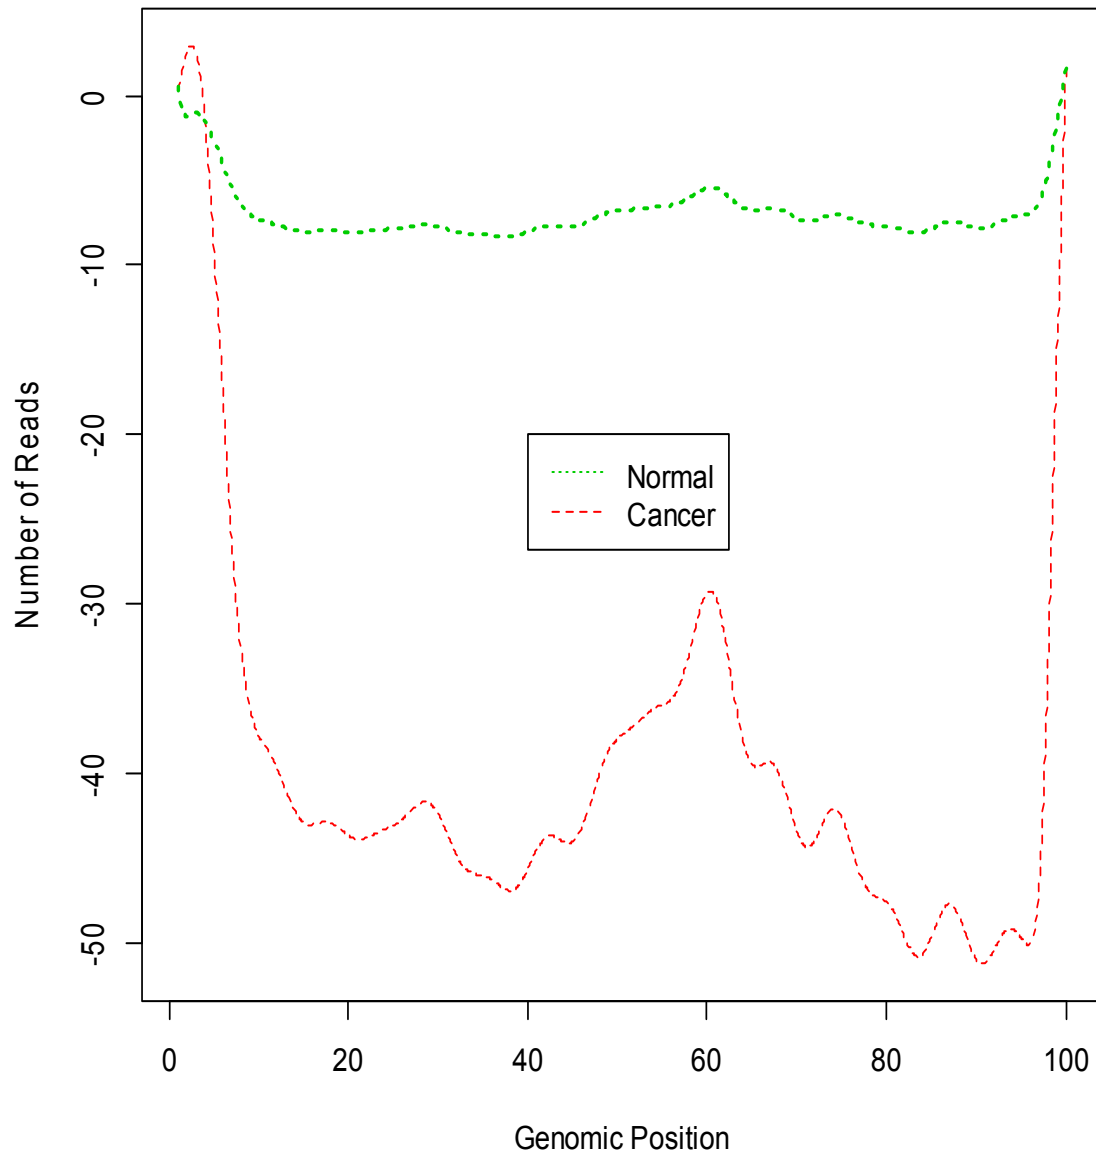

Fig S1B. Average unit-step response curves of gene ABHD10 in the tumor and normal samples.

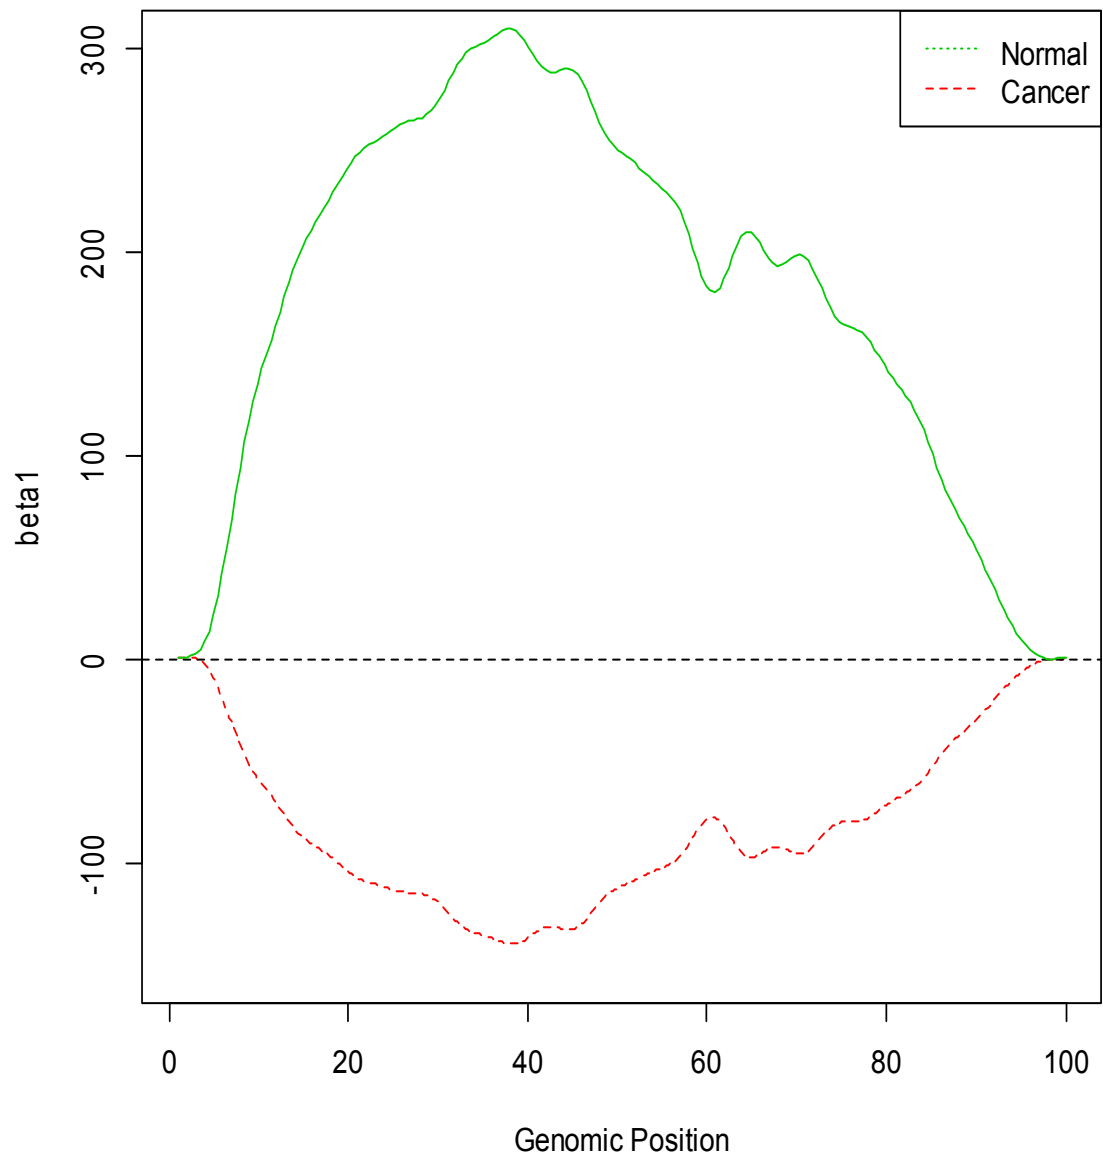

Fig. S1C. Average coefficient curve  $\beta_1(t)$  of the ODE for gene ABHD10.

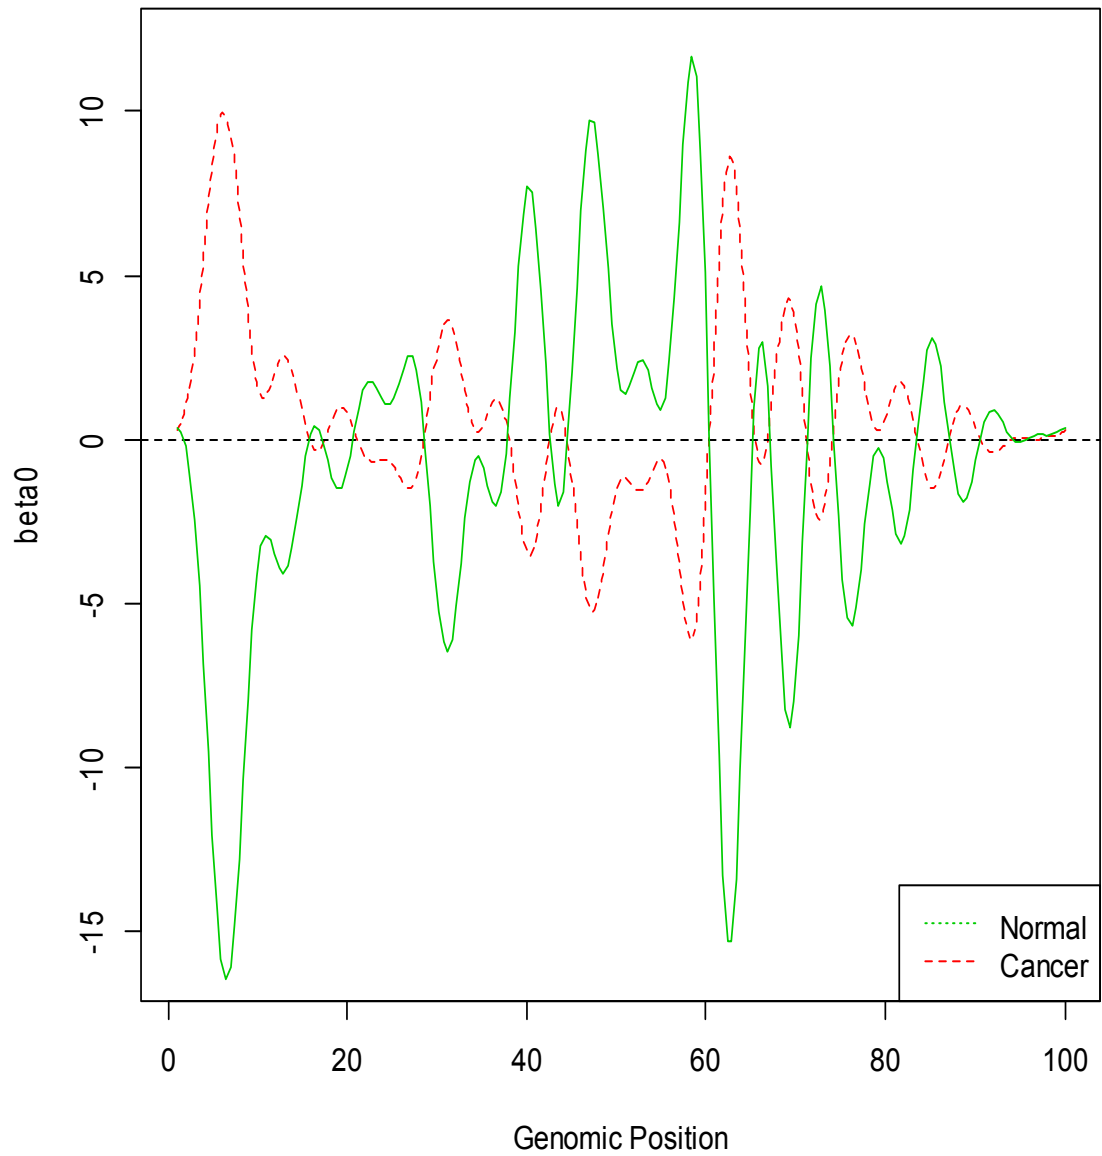

Fig. S1D. Average coefficient curve  $\beta_0(t)$  of the ODE for gene ABHD10.

### Mean Curves for Gene BST2

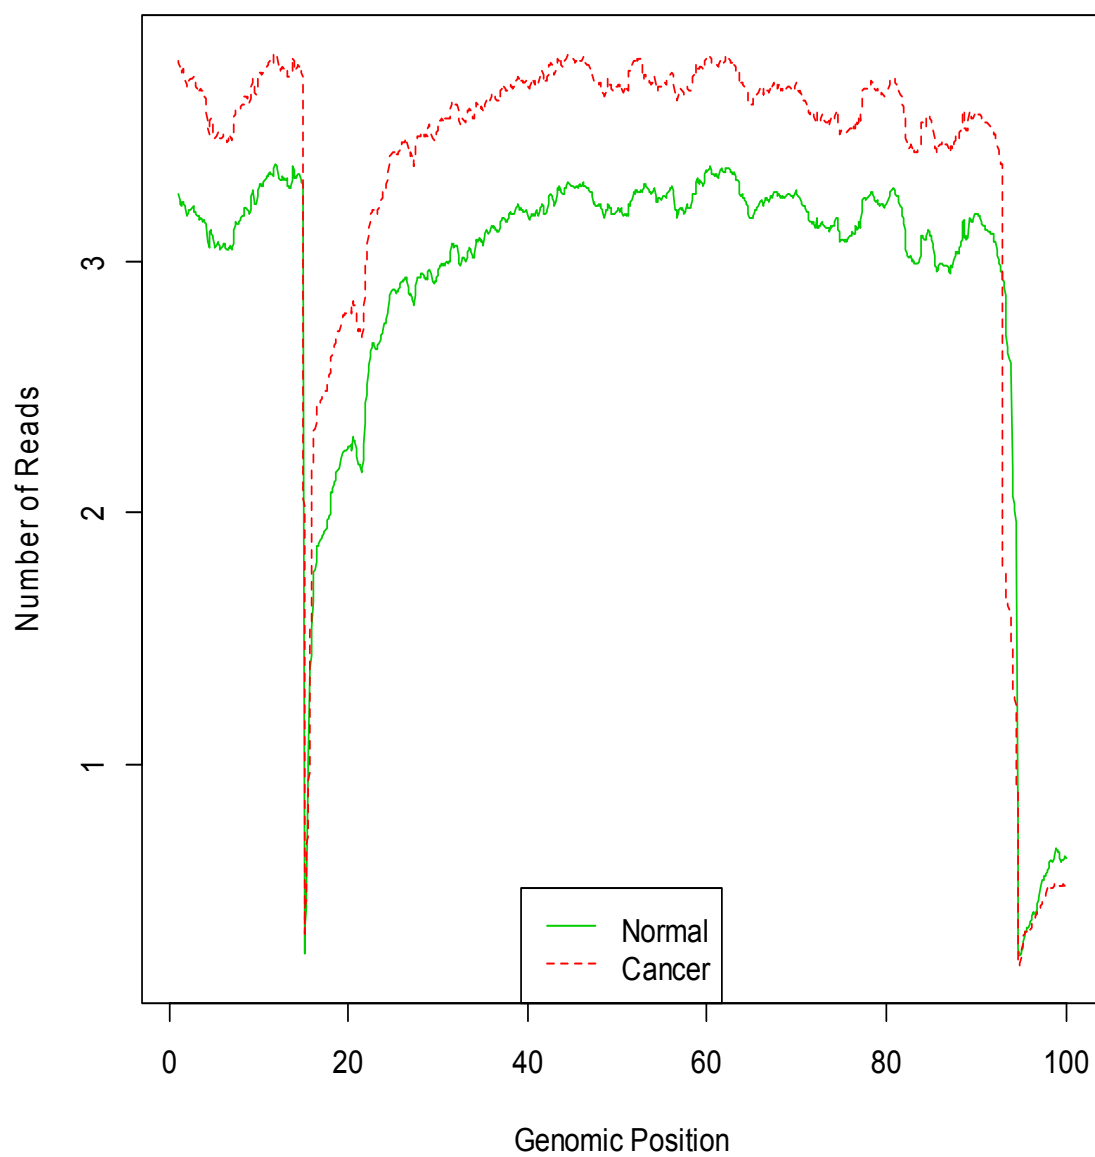

Fig. S2A. Average expression curves of gene BST2 in tumor and normal samples.

### Mean Response Curves for Gene BST2

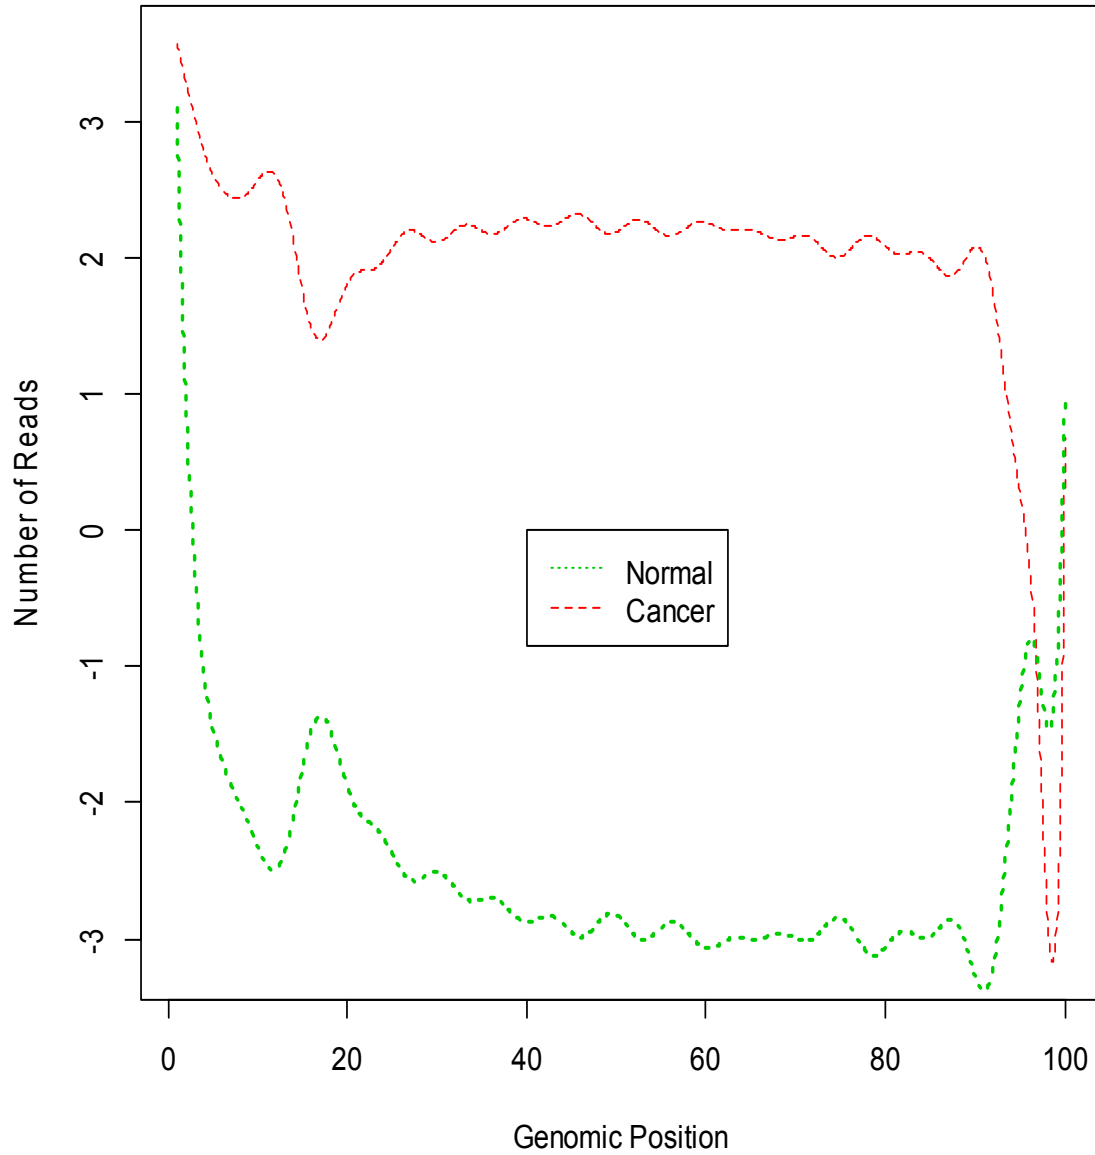

Fig. S2B. Average unit-step response curves of gene BST2 in the tumor and normal samples.

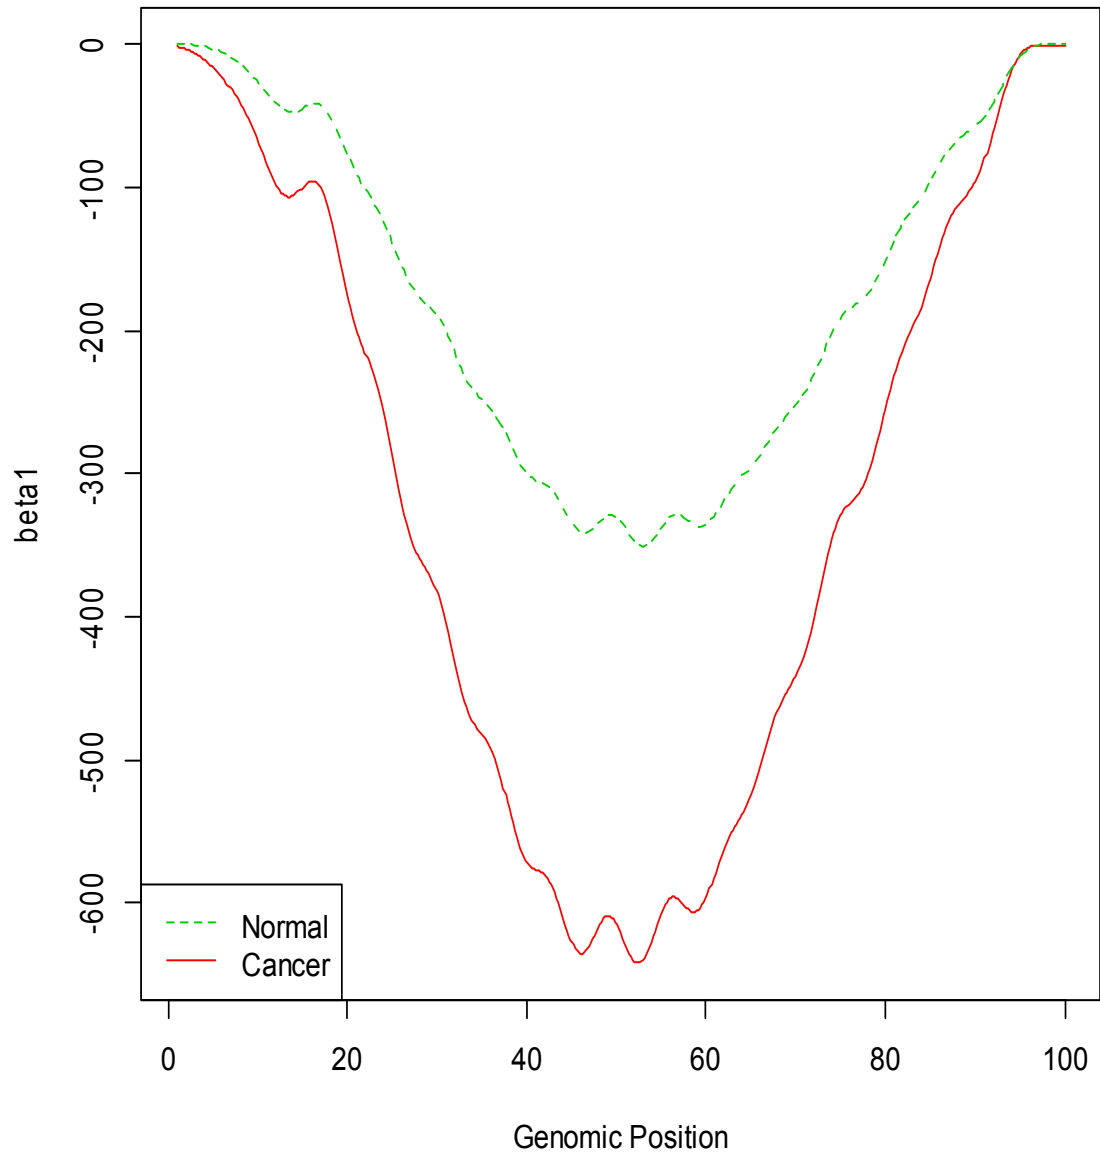

Fig. S2C. Average coefficient curve  $\beta_1(t)$  of the ODE for gene BST2.

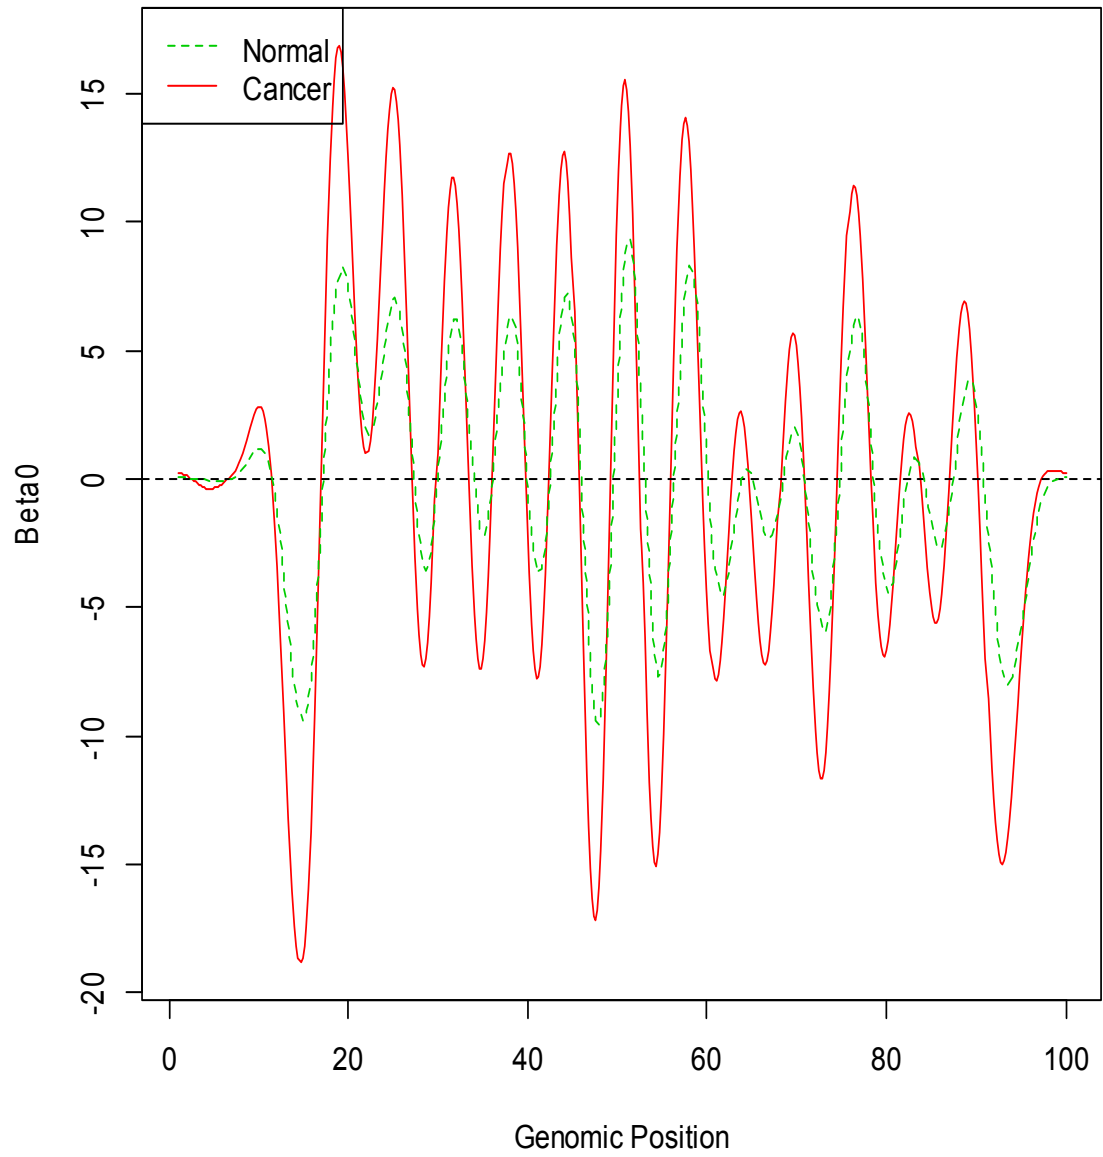

Fig. S2D. Average coefficient curve  $\beta_0(t)$  of the ODE for gene BST2.
